# Supplementary material for: TRIM58 functions as a tumor suppressor in colorectal cancer by promoting RECQL4 ubiquitination to inhibit the AKT signaling pathway
Source: Springer Nature journal article supplement (doi:10.1186/s12957-023-03124-4), 2023-07-29

Figure 1C

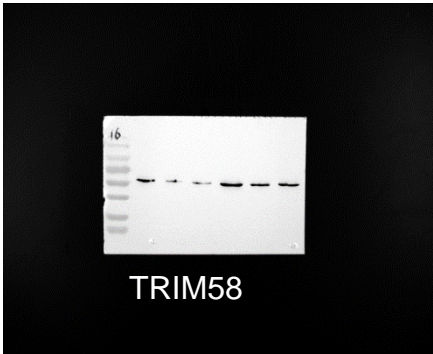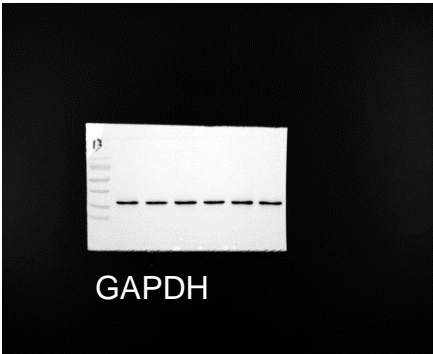

Figure 1I

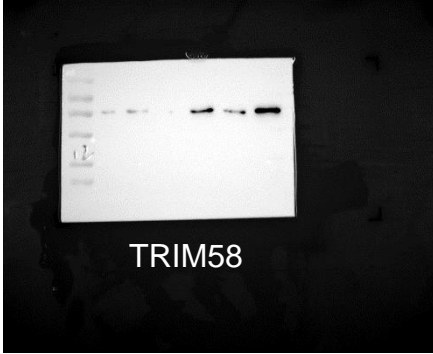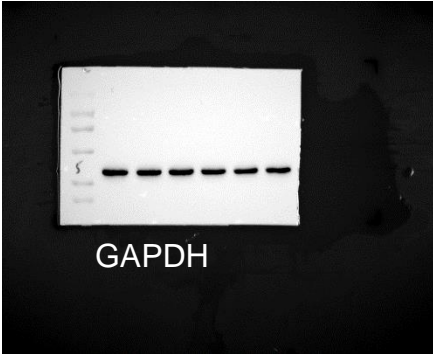

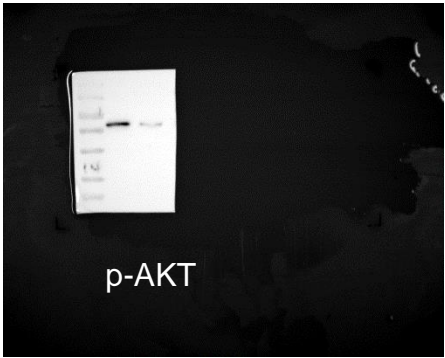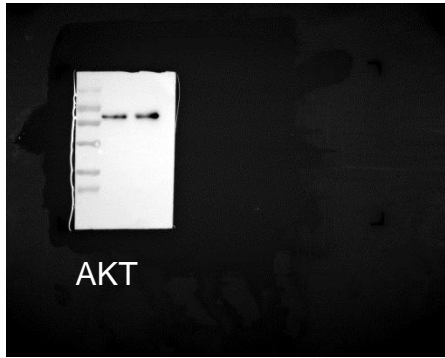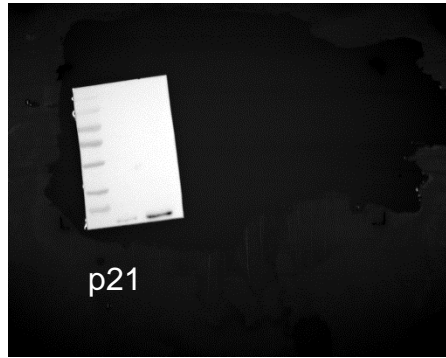

Figure 2D

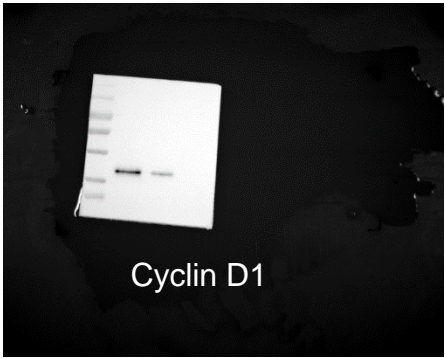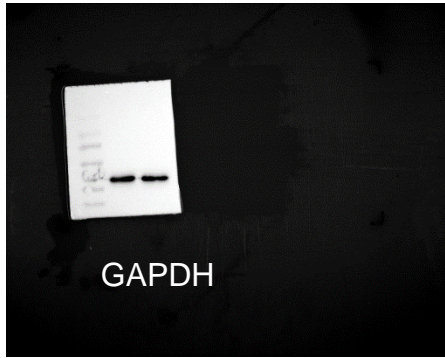

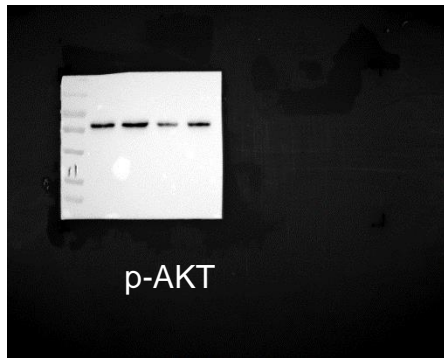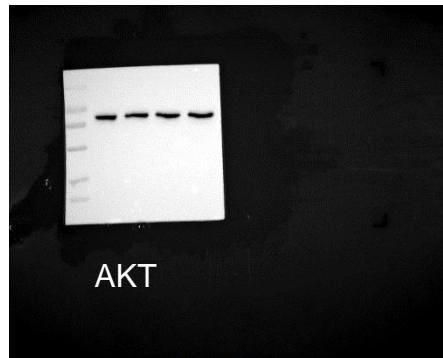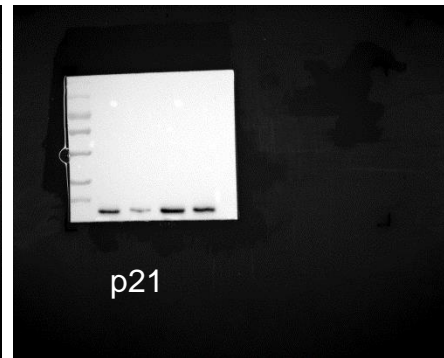

Figure 3D

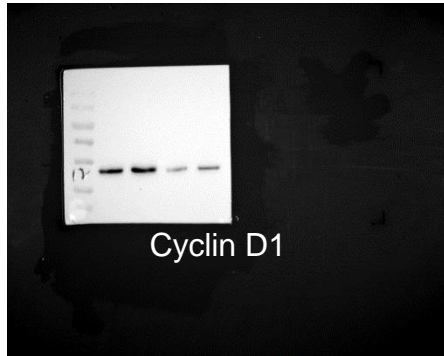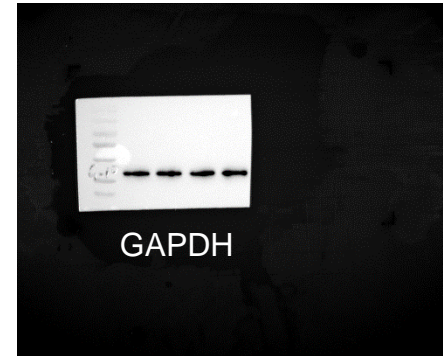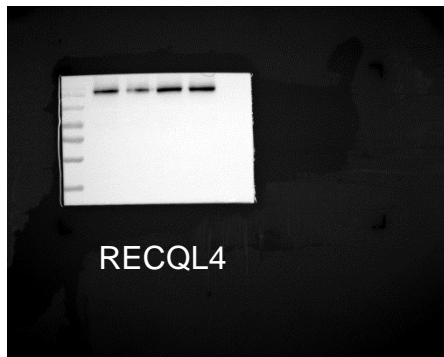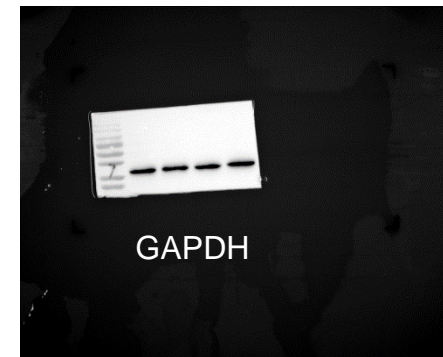

Figure 4B

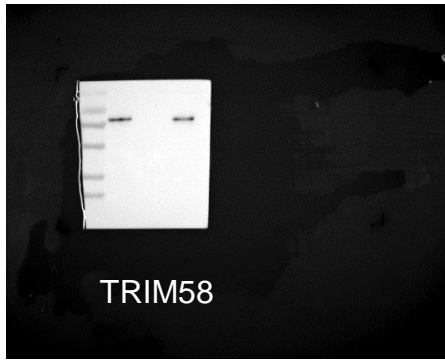

TRIM58

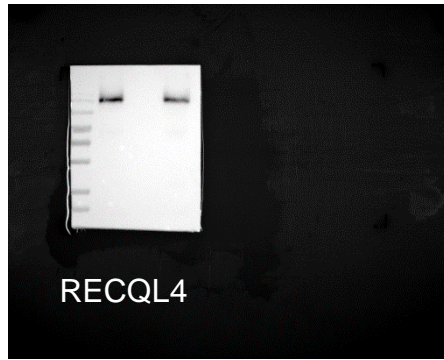

RECQL4

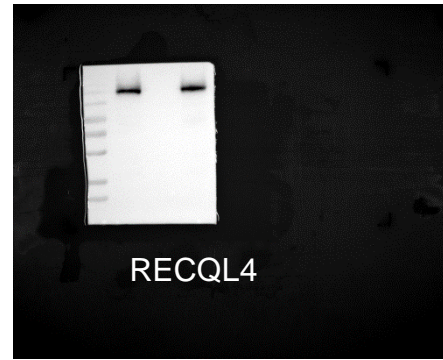

RECQL4

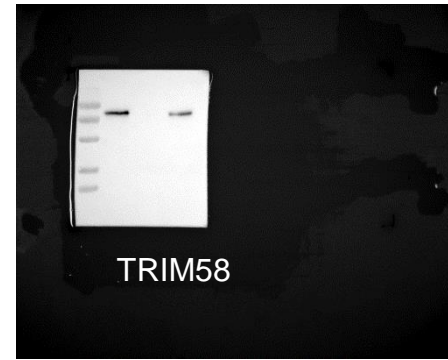

TRIM58

Figure 4C Up

Figure 4C Down

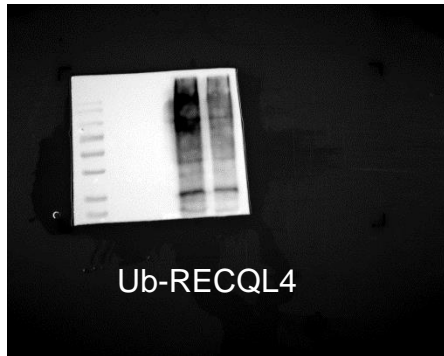

Ub-RECQL4

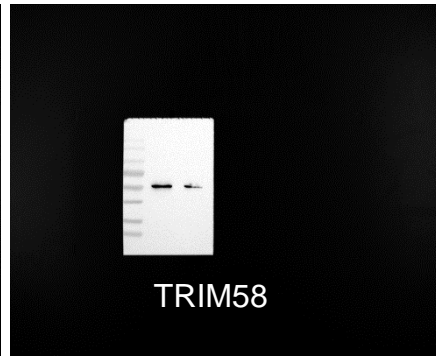

TRIM58

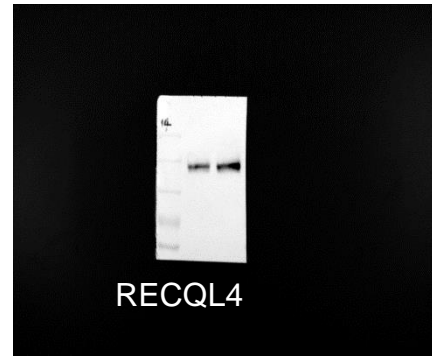

RECQL4

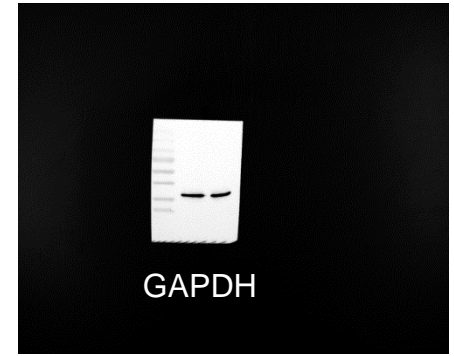

GAPDH

Figure 4D Left

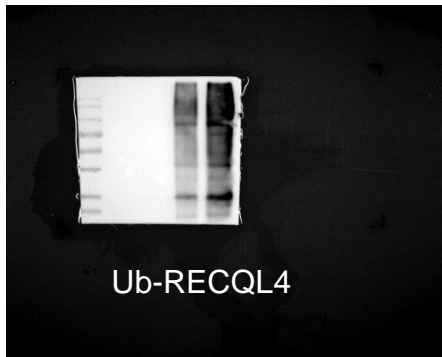

Ub-RECQL4

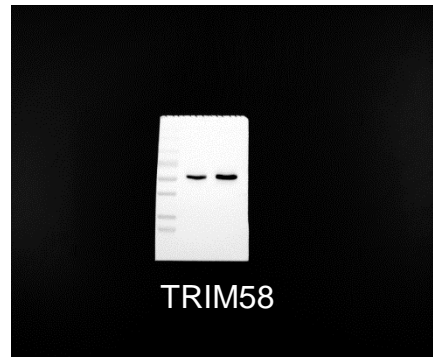

TRIM58

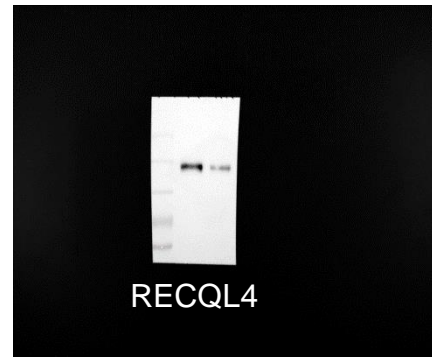

RECQL4

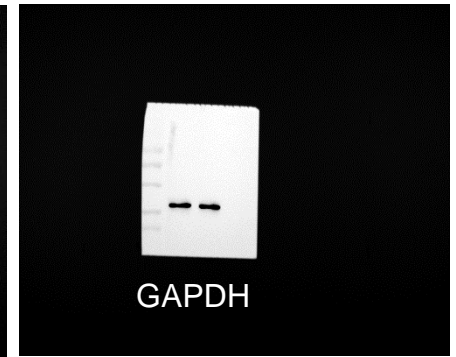

GAPDH

Figure 4D Right

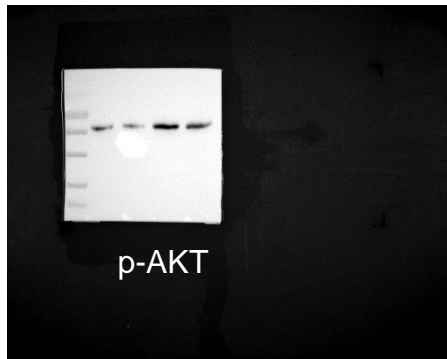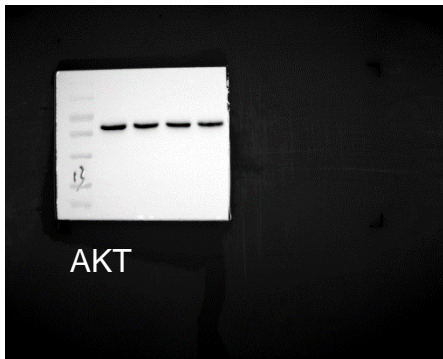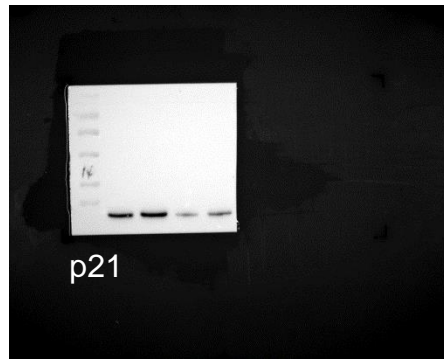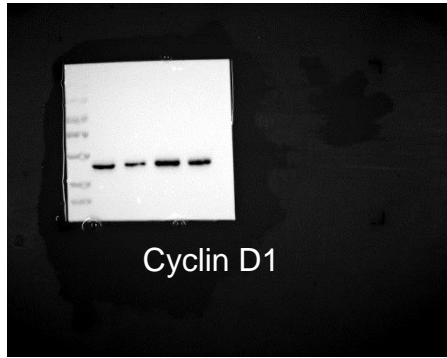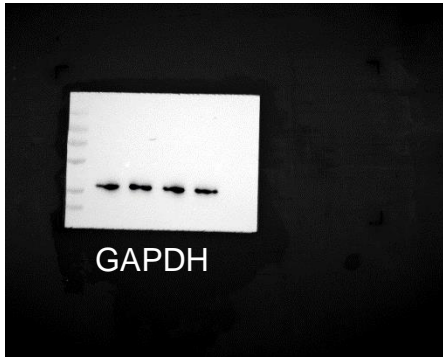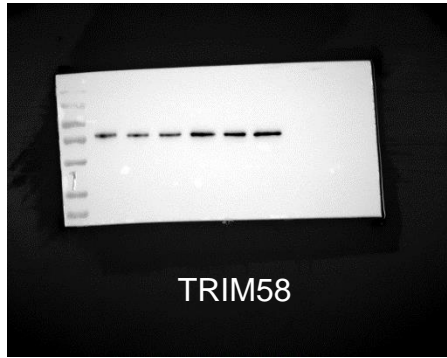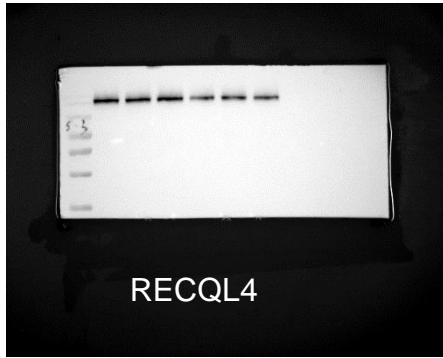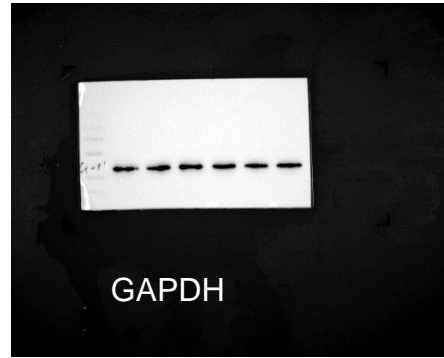

Figure 5D

Figure 6C

Figure S1B

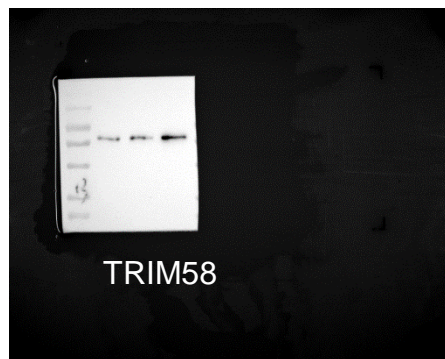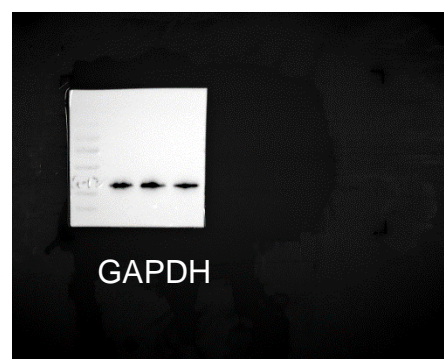

Figure S1D

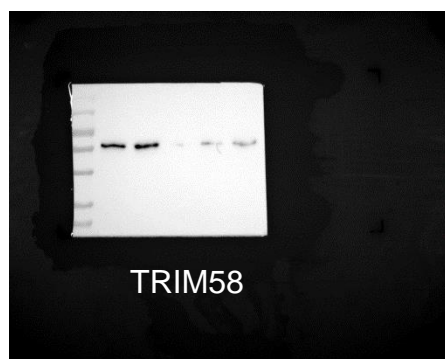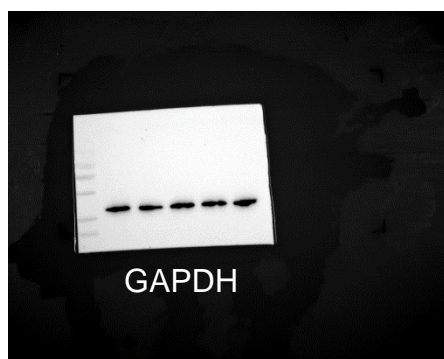

Figure S1K

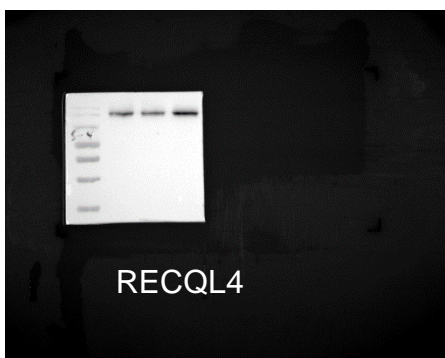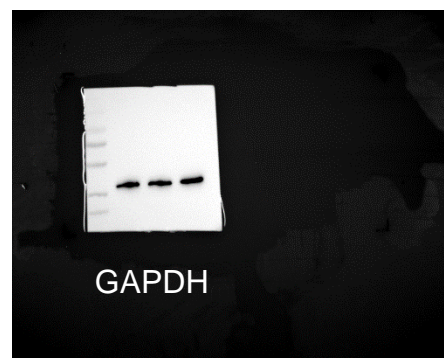

Supplement: MOESM3 [file 25863172]
